# Supplementary material for: Down-regulated expression of miR-99a is associated with lymph node metastasis and predicts poor outcome in stage IB cervical squamous cell carcinoma: a case-control study
Source: PubMed Central journal article supplement — Ann Transl Med. 2022 Jun;10(12):663. doi: 10.21037/atm-22-2483 (PMC9279763; doi:10.21037/atm-22-2483), 2022-06
Supplement: atm-10-12-663-dss.pdf [file atm-10-12-663-dss.pdf]

## Data Sharing Statement

|                     |                                                                                                                                                    |                                                                                                                  |
|---------------------|----------------------------------------------------------------------------------------------------------------------------------------------------|------------------------------------------------------------------------------------------------------------------|
| <b>Article Info</b> | <a href="https://dx.doi.org/10.21037/atm-22-2483">https://dx.doi.org/10.21037/atm-22-2483</a>                                                      |                                                                                                                  |
| <b>Item</b>         | <b>Question</b>                                                                                                                                    | <b>Authors' Response<br/>(place "-" if not applicable)</b>                                                       |
| 1                   | Would you like to share data collected for your study to others?                                                                                   | Yes, the data included in the study can be shared.                                                               |
| 2                   | If not, would you like to share the reason for your decision?                                                                                      | -                                                                                                                |
| 3                   | What data in particular will be shared?                                                                                                            | The detailed results of the investigation can be shared.                                                         |
| 4                   | Any other documents will be share? Such as study protocol, statistical analysis plan, informed consent form, clinical study report, analytic code. | Yes, study protocol, statistical analysis plan, informed consent form, and clinical study report, can be shared. |
| 5                   | When will data availability begin?                                                                                                                 | The data will be available when the study is published.                                                          |
| 6                   | When will data availability end?                                                                                                                   | In 10 years.                                                                                                     |
| 7                   | To whom will you share the data?                                                                                                                   | To medical staff or researchers.                                                                                 |
| 8                   | For what type of analysis or purpose?                                                                                                              | For medical analysis or research.                                                                                |
| 9                   | How or where can the data/documents be obtained?                                                                                                   | The data/documents can be sent by e-mail on request.                                                             |
| 10                  | Any other restrictions?                                                                                                                            | No                                                                                                               |
